# Supplementary material for: Analysis of Intrinsic Breast Cancer Subtypes: The Clinical Utility of Epigenetic Biomarkers and TP53 Mutation Status in Triple-Negative Cases
Source: MDPI journal article supplement (doi:10.3390/ijms232315429), 2022-12-06
Supplement: s1 [file s1]

**Supplementary Table S2.** Pathogenic *TP53* pathogenic gene variants identified in breast cancer.

| Nr. | Mutation site, bp   | Exon / Intron | Codon no | Sequence alteration | Mutation type  | WT aminoacid | Mutant aminoacid | Mutant protein codon | Mutation effect        | Affected gene region | Average mutation frequency, %* | Mutation found in samples |
|-----|---------------------|---------------|----------|---------------------|----------------|--------------|------------------|----------------------|------------------------|----------------------|--------------------------------|---------------------------|
| 1   | 11608:T>C           | 4-intron      | 0        | c.375+2T>C          | A:T>G:C        | -            | -                | -                    | splice site alteration | intron               | 45.24                          | 1                         |
| 2   | 11608:T>G           | 4-intron      | 0        | c.375+2T>G          | A:T>C:G        | -            | -                | -                    | splice site alteration | intron               | 58.8                           | 1                         |
| 3   | 11621-11643:DEL(23) | 4-intron      | 0        | c.376-14_384del23   | del            | -            | -                | -                    | splice site alteration | intron               | 58.8                           | 1                         |
| 4   | 12278:T>C           | 4-intron      | 0        | c.376-86T>C         | A:T>G:C        | -            | -                | -                    | intronic               | intron               | 10.19                          | 1                         |
| 5   | 12383:A>G           | 5-exon        | 132      | c.395A>G            | A:T>G:C        | Lys          | Arg              | p.K132R              | missense               | DNA binding          | 49.34                          | 1                         |
| 6   | 12457:G/T           | 5-exon        | 157      | c.469G>T            | G:C>T:A        | Val          | Phe              | p.V157F              | missense               | DNA binding          | 44.43                          | 1                         |
| 7   | 12515:G/A           | 5-exon        | 176      | c.527G>A            | G:C>A:T        | Cys          | Tyr              | p.C176Y              | missense               | DNA binding          | 33.75                          | 1                         |
| 8   | 12517-12534:DEL(18) | 5-exon        | 177      | c.529_546del18      | del            | Pro          | -                | p.P177_C182delPHHERC | frameshift             | DNA binding          | 45.05                          | 1                         |
| 9   | 12521:A/C           | 5-exon        | 178      | c.533A>C            | A:T>C:G        | His          | Pro              | p.H178P              | missense               | DNA binding          | 0.53                           | 2                         |
| 10  | 12524:A>G           | 5-exon        | 179      | c.536A>G            | A:T>G:C        | His          | Arg              | p.H179R              | missense               | DNA binding          | 53.99                          | 1                         |
| 11  | 12643:C>T           | 6-exon        | 192      | c.574C>T            | G:C>A:T        | Gln          | STOP             | p.Q192*              | nonsense               | DNA binding          | 75.63                          | 1                         |
| 12  | 12650:T>A           | 6-exon        | 194      | c.581T>A            | A:T>T:A        | Leu          | His              | p.L194H              | missense               | DNA binding          | 20.98                          | 1                         |
| 13  | 12653:T>C           | 6-exon        | 195      | c.584T>C            | A:T>G:C        | Ile          | Thr              | p.I195T              | missense               | DNA binding          | 44.97                          | 1                         |
| 14  | 12655:C>T           | 6-exon        | 196      | c.586C>T            | G:C>A:T at CpG | Arg          | STOP             | p.R196*              | nonsense               | DNA binding          | 56.21                          | 1                         |
| 15  | 12694-12695:AG>--   | 6-exon        | 209      | c.625_626del2       | del            | Arg          | -                | -                    | frameshift             | DNA binding          | 18.41                          | 1                         |
| 16  | 12710:A>G           | 6-exon        | 214      | c.641A>G            | A:T>G:C        | His          | Arg              | p.H214R              | missense               | DNA binding          | 76.55                          | 1                         |
| 17  | 13380:G>A           | 7-exon        | 248      | c.743G>A            | G:C>A:T at CpG | Arg          | Gln              | p.R248Q              | missense               | DNA binding          | 46.2                           | 1                         |
| 18  | 13392:T/C           | 7-exon        | 252      | c.755T>C            | A:T>G:C        | Leu          | Pro              | p.L252P              | missense               | DNA binding          | 53.86                          | 1                         |
| 19  | 13420:G>A           | 7-intron      | 0        | c.782+1G>A          | G:C>A:T        | -            | -                | -                    | splice site alteration | intron               | 71.41                          | 1                         |
| 20  | 13781:G/-           | 8-exon        | 267      | c.801del1           | del            | Arg          | -                | -                    | frameshift             | DNA binding          | 34.5                           | 1                         |
| 21  | 13797:C/T           | 8-exon        | 273      | c.817C>T            | G:C>A:T at CpG | Arg          | Cys              | p.R273C              | missense               | DNA binding          | 43.04                          | 1                         |
| 22  | 13798:G>A           | 8-exon        | 273      | c.818G>A            | G:C>A:T at CpG | Arg          | His              | p.R273H              | missense               | DNA binding          | 90.78                          | 2                         |
| 23  | 13813:C>G           | 8-exon        | 278      | c.833C>G            | G:C>C:G        | Pro          | Arg              | p.P278R              | missense               | DNA binding          | 30.53                          | 1                         |
| 24  | 13833:G>A           | 8-exon        | 285      | c.853G>A            | G:C>A:T        | Glu          | Lys              | p.E285K              | missense               | DNA binding          | 36.89                          | 1                         |
| 25  | 13833:G>T           | 8-exon        | 285      | c.853G>T            | G:C>T:A        | Glu          | STOP             | p.E285*              | nonsense               | DNA binding          | 16.26                          | 1                         |
| 26  | 13896:C/T           | 8-exon        | 306      | c.916C>T            | G:C>A:T at CpG | Arg          | STOP             | p.R306*              | nonsense               | DNA binding          | 29.64                          | 1                         |
| 27  | 13900:G/T           | 8-intron      | 0        | c.919+1G>T          | G:C>T:A        | -            | -                | -                    | splice site alteration | intron               | 32.28                          | 1                         |

\*- Average mutation frequency calculated as forward and reverse DNA chain analysis by Roche Junior Sequencer Software.
