# Supplementary material for: Analysis of Intrinsic Breast Cancer Subtypes: The Clinical Utility of Epigenetic Biomarkers and TP53 Mutation Status in Triple-Negative Cases
Source: MDPI journal article supplement (doi:10.3390/ijms232315429), 2022-12-06
Supplement: s1 [file s1]

### Supplementary Table S5

PCR cycling conditions for *TP53* amplicon library creation for NGS

| Temperature, °C | Duration | Cycles |
|-----------------|----------|--------|
| 98 °C           | 30 s     | 1      |
| 98 °C           | 10 s     | 34     |
| 65 °C           | 30 s     |        |
| 72 °C           | 30 s     |        |
| 72 °C           | 10 min   | 1      |
| 4 °C            | ∞        | 1      |

NGS Primers used for *TP53* amplicon library PCR

| Primer ID | Primer  | Primer sequence (5'-3')             |
|-----------|---------|-------------------------------------|
| Exon - 4  | Forward | uni-MID-GACTGCTCTTTTCACCCATCTA      |
|           | Reverse | uni-MID-AGGAATCCCAAAGTTCCAAACAA     |
| Exon - 5  | Forward | uni-MID-TTGCAGGAGGTGCTTACG          |
|           | Reverse | uni-MID-GAGCAATCAGTGAGGAATCAGA      |
| Exon - 6  | Forward | uni-MID-GTCACAGCACATGACGGAG         |
|           | Reverse | uni-MID-GGTTATAGGGAGGTCAAATAAGCAG   |
| Exon - 7  | Forward | uni-MID-CTTGCCACAGGTCTCCC           |
|           | Reverse | uni-MID-AGAAGCCACAGGTTAAGAGGT       |
| Exon - 8  | Forward | uni-MID-CTTTGGGACCTCTTAACCTGT       |
|           | Reverse | uni-MID-TGATAAAAGTGAATCTGAGGCATAACT |

**Abbreviations:** uni - universal segment; MID - multiplex identifier.
