# Supplementary material for: Analysis of Intrinsic Breast Cancer Subtypes: The Clinical Utility of Epigenetic Biomarkers and TP53 Mutation Status in Triple-Negative Cases
Source: MDPI journal article supplement (doi:10.3390/ijms232315429), 2022-12-06
Supplement: s1 [file s1]

**Supplementary Table S3.** Primers used for methylation-specific PCR.

| Gene            | Primer pair ID | Forward 5'-3'               | Reverse 5'-3'              | Amplicon length, bp | PCR cycles | Primer annealing T, (°C) | Ref.                                |
|-----------------|----------------|-----------------------------|----------------------------|---------------------|------------|--------------------------|-------------------------------------|
| <i>PRKCB</i>    | M              | TAAGCGTAGTTGGACGAGC         | AAAACGACGACCCTACTAC        | 124                 | 36         | 56                       | [27]                                |
|                 | U              | TGTTAAGTGATGTTGGATGAGT      | AAAACAACAACCACTACTACACC    | 127                 |            |                          |                                     |
| <i>ADAMTS12</i> | M              | GAGTTCGGGAGGAAGATGTATC      | ACAACGACTACAAAACCTACCCG    | 241                 | 35         | 62                       |                                     |
|                 | U              | GAGTTTGGGAGGAAGATGTATT      | AAACAACAACCTACAAAACCTACCA  | 243                 |            |                          |                                     |
| <i>NAALAD2</i>  | M              | TATTTATTATGTTCTGGGTATTGC    | CCTACTACATTCGCGAACTTC      | 244                 | 35         | 58                       |                                     |
|                 | U              | GTTATTATTATGTTTGGGTATTGT    | CCTACTACATTCACAACTTCAA     | 246                 |            |                          |                                     |
| <i>FILIP1L</i>  | M              | TACGGTTCGTTTATACGGTC        | CGACCTATAAACGTTACGTCA      | 160                 | 37         | 57                       | [28]                                |
|                 | U              | GGAATTATGGTTTGTTTATATGGTT   | CCCAACCTATAAACATTACATCAC   | 167                 |            |                          |                                     |
| <i>DAPK1</i>    | M              | GGATAGTCGGATCGAGTTAACGTC    | CCCTCCCAACGCCGA            | 98                  | 37         | 66                       |                                     |
|                 | U              | GGAGGATAGTTGGATTGAGTTAATGTT | CAAATCCCTCCCAACACCAA       | 106                 |            |                          |                                     |
| <i>GSTP1</i>    | M              | TTCGGGTGTAGCGGTCGTC         | GCCCCAATACTAAATCACGACG     | 91                  | 37         | 60                       |                                     |
|                 | U              | GATGTTTGGGGTGTAGTGGTTGTT    | CCACCCCAATACTAAATCACAACA   | 97                  |            |                          |                                     |
| <i>MGMT</i>     | M              | ATTTGGTGAGTGTGTTGGTCTGTTTC  | AAAACGCACCTAAAACCTCGCCC    | 159                 | 37         | 67                       |                                     |
|                 | U              | ATTTGGTGAGTGTGTTGGTGTGTTTT  | AAAACACACCTAAAACCTCACCC    | 159                 |            | 64                       |                                     |
| <i>P14</i>      | M              | GTGTTAAAGGGCGGCGTAGC        | AAAACCCTCACTCGCGACGA       | 122                 | 37         | 66                       |                                     |
|                 | U              | TTTTTGGTGTTAAAGGGTGGTGTAGT  | CACAAAAACCTCACTCACAAACA    | 132                 |            |                          |                                     |
| <i>P16</i>      | M              | TTATTAGAGGGTGGGGCGGATCGC    | GACCCCGAACCGCGACCGTAA      | 150                 | 36         | 64-30s                   |                                     |
|                 | U              | TTATTAGAGGGTGGGGTGGATTGT    | CAACCCCAAAACCACAACCATAA    | 151                 |            |                          |                                     |
| <i>RARB</i>     | M              | TCGAGAACGCGAGCGATTTCG       | GACCAATCCAACCGAAACGA       | 145                 | 39         | 60                       |                                     |
|                 | U              | TTGAGAATGTGAGTGATTGA        | AACCAATCCAACCAAAACAA       | 145                 |            |                          |                                     |
| <i>RASSF1</i>   | M              | GGGTTTTGCGAGAGCGCG          | GCTAACAACGCGAACCG          | 169                 | 39         | 61                       |                                     |
|                 | U              | GGTTTTGTGAGAGTGTGTTTAG      | CACTAACAACACAAACCAAC       | 169                 |            | 63                       |                                     |
| <i>ESR1-1</i>   | M              | TTTTGGGATTGTATTGTTTTCGTC    | AACAAAATACAAACCGTATCCCCG   | 197                 | 37         | 60                       |                                     |
|                 | U              | TTTTGGGATTGTATTGTTTTGTG     | AAACAAAATACAAACCATATCCCCA  | 198                 |            |                          |                                     |
| <i>ESR1-4</i>   | M              | CGAGTTGGAGTTTTGAATCGTTC     | CTACGCGTTAACGACGACCG       | 151                 | 37         | 58                       |                                     |
|                 | U              | ATGAGTTGGAGTTTTGAATTGTTT    | ATAAACCTACACATTAACAACAACCA | 158                 |            |                          |                                     |
| <i>MT1E</i>     | M              | GGATTCGGGAATATCGC           | ACGAAAATCGAACCGAAC         | 217                 | 38         | 56                       | [29]                                |
|                 | U              | TTTGATTTTGGGAATATTGT        | ACAAAAATCAAACCAAACACA      | 220                 |            |                          |                                     |
| <i>MT1F</i>     | M              | GTATTCGGAATTTTAAGGGGC       | CGAACCGTCCCTTTAAAATC       | 134                 | 36         | 56                       |                                     |
|                 | U              | TAGGTATTTGGAATTTTAAGGGGT    | CACAAACCATCCCTTTAAAATC     | 139                 |            |                          |                                     |
| <i>MT1G</i>     | M              | TCGTATACGGGGGTATAGC         | GCGATCCCACCTAAACT          | 131                 | 37         | 58                       |                                     |
|                 | U              | AAGTTGTATATGGGGGTATAGT      | CCCACAATCCCAACCTAAACT      | 137                 |            |                          |                                     |
| <i>APC</i>      | M              | TATTGCGGAGTGCGGGTC          | TCGACGAACTCCCGACGA         | 98                  | 38         | 59                       | Methyl Primer Express v1.0 software |
|                 | U              | GTGTTTTATTGTGGAGTGGGGT      | CCAATCAACAAACTCCCAACAA     | 108                 |            |                          | Methyl Primer Express v1.0 software |
| <i>RUNX3</i>    | M              | ATAATAGCGGTCGTTAGGGCGTCG    | GCTTCTACTTTCCGCTTCTCGCG    | 115                 | 38         | 59                       | Methyl Primer Express v1.0 software |
|                 | U              | ATAATAGTGGTTGTTAGGGTGTG     | ACTTCTACTTTCCCACTTCTCACA   | 115                 |            |                          | Methyl Primer Express v1.0 software |

**Abbreviations:** M - methylated sequence, U - unmethylated sequence
