# Supplementary material for: Analysis of Intrinsic Breast Cancer Subtypes: The Clinical Utility of Epigenetic Biomarkers and TP53 Mutation Status in Triple-Negative Cases
Source: MDPI journal article supplement (doi:10.3390/ijms232315429), 2022-12-06
Supplement: s1 [file s1]

**Supplementary Table S1.** Methylation frequencies of analysed genes in breast cancer (BC) tumors, control samples and BC subtypes.

| Gene            | Methylated BC (n/N) | Sensitivity, % | Methylated controls (n/N) | Specificity, % | P-value         | LA, % (n/N) | LB, % (n/N) | HER2+, % (n/N) | TN, % (n/N) |
|-----------------|---------------------|----------------|---------------------------|----------------|-----------------|-------------|-------------|----------------|-------------|
| <i>PRKCB</i>    | 86/111              | 77             | 0/29                      | 100            | < <b>0.0001</b> | 85 (46/54)  | 83 (19/23)  | 83 (15/18)     | 38 (6/16)   |
| <i>RASSF1</i>   | 79/115              | 69             | 4/29                      | 86             | < <b>0.0001</b> | 78 (43/55)  | 65 (15/23)  | 67 (14/21)     | 44 (7/16)   |
| <i>ADAMTS12</i> | 67/107              | 63             | 2/29                      | 93             | < <b>0.0001</b> | 65 (34/52)  | 68 (15/22)  | 71 (12/17)     | 38 (6/16)   |
| <i>APC</i>      | 61/115              | 53             | 0/29                      | 100            | < <b>0.0001</b> | 56 (30/54)  | 50 (12/24)  | 71 (15/21)     | 25 (4/16)   |
| <i>RUNX3</i>    | 46/114              | 40             | 0/29                      | 100            | < <b>0.0001</b> | 41 (22/54)  | 48 (11/23)  | 57 (12/21)     | 6 (1/16)    |
| <i>ESR1-1</i>   | 51/116              | 44             | 2/29                      | 93             | <b>0.0002</b>   | 47 (26/55)  | 50 (12/24)  | 38 (8/21)      | 36 (5/14)   |
| <i>MGMT</i>     | 28/116              | 24             | 0/28                      | 100            | <b>0.002</b>    | 22 (12/55)  | 25 (6/24)   | 29 (6/21)      | 25 (4/16)   |
| <i>GSTP1</i>    | 24/116              | 21             | 0/29                      | 100            | <b>0.004</b>    | 20 (11/55)  | 21 (5/24)   | 33 (7/21)      | 6 (1/16)    |
| <i>MTIE</i>     | 40/113              | 35             | 4/29                      | 86             | <b>0.026</b>    | 31 (17/55)  | 39 (9/23)   | 21 (4/19)      | 63 (10/16)  |
| <i>RARB</i>     | 22/116              | 19             | 1/29                      | 97             | <b>0.046</b>    | 18 (10/55)  | 25 (6/24)   | 14 (3/21)      | 19 (3/16)   |
| <i>ESR1-4</i>   | 63/111              | 57             | 11/29                     | 62             | 0.095           | 57 (30/53)  | 63 (15/24)  | 65 (13/20)     | 36 (5/14)   |
| <i>MTIG</i>     | 39/112              | 35             | 6/29                      | 79             | 0.184           | 37 (20/54)  | 45 (10/22)  | 35 (7/20)      | 13 (2/16)   |
| <i>DAPK1</i>    | 17/116              | 15             | 7/29                      | 76             | 0.262           | 16 (9/55)   | 13 (3/24)   | 19 (4/21)      | 6 (1/16)    |
| <i>FILIP1L</i>  | 53/102              | 52             | 18/28                     | 36             | 0.288           | 42 (21/50)  | 57 (12/21)  | 38 (6/16)      | 93 (14/15)  |
| <i>NAALAD2</i>  | 61/108              | 56             | 13/28                     | 54             | 0.401           | 56 (29/52)  | 64 (14/22)  | 50 (9/18)      | 56 (9/16)   |
| <i>P16</i>      | 4/116               | 3              | 0/29                      | 100            | 0.584           | 2 (1/55)    | 8 (2/24)    | 5 (1/21)       | 0 (0/16)    |
| <i>MTIF</i>     | 2/110               | 2              | 0/29                      | 100            | 1.0             | 4 (2/54)    | 0 (0/22)    | 0 (0/18)       | 0 (0/16)    |
| <i>P14</i>      | 3/115               | 3              | 0/29                      | 100            | 1.0             | 4 (2/54)    | 4 (1/24)    | 0 (0/18)       | 0 (0/16)    |

**Abbreviations:** LA – Luminal A, LB – Luminal B, HER2+ – HER2 positive and Luminal B HER2 positive, TN BC – triple negative BC.
