# Supplementary material for: Analysis of Intrinsic Breast Cancer Subtypes: The Clinical Utility of Epigenetic Biomarkers and TP53 Mutation Status in Triple-Negative Cases
Source: MDPI journal article supplement (doi:10.3390/ijms232315429), 2022-12-06
Supplement: s1 [file s1]

**Supplementary Table S4.** Methylation specific PCR cycling conditions

| Temperature, °C    | Duration | Cycles |
|--------------------|----------|--------|
| 95 °C              | 7 min    | 1      |
| 95 °C              | 45 s     | 35–37  |
| According to gene* | 45 s     |        |
| 72 °C              | 45 s     |        |
| 72 °C              | 10 min   | 1      |
| 4 °C               | ∞        | 1      |

\* *P14* – 66 °C; *P16* – 64 °C–30s; *MGMT* – 67 °C (M) and 64 °C (U); *RARB* – 60 °C; *RASSF1* – 61 °C (M) and 63 °C (U); *DAPK1* – 66 °C; *GSTP1* – 60 °C; *ESR1-1* – 60 °C; *ESR1-4* – 58 °C; *PRKCB* – 56 °C; *MT1E* – 56 °C; *MT1F* – 55 °C; *MT1G* – 58 °C; *APC* – 59 °C; *ADAMTS12* – 62 °C; *RUNX3* – 59 °C; *NAALAD2* – 58 °C.
